# Supplementary material for: Wolves, dogs and humans in regular contact can mutually impact each other’s skin microbiota
Source: PubMed Central journal article supplement (PMC8385068; doi:10.1038/s41598-021-96160-7), 2021-08-24

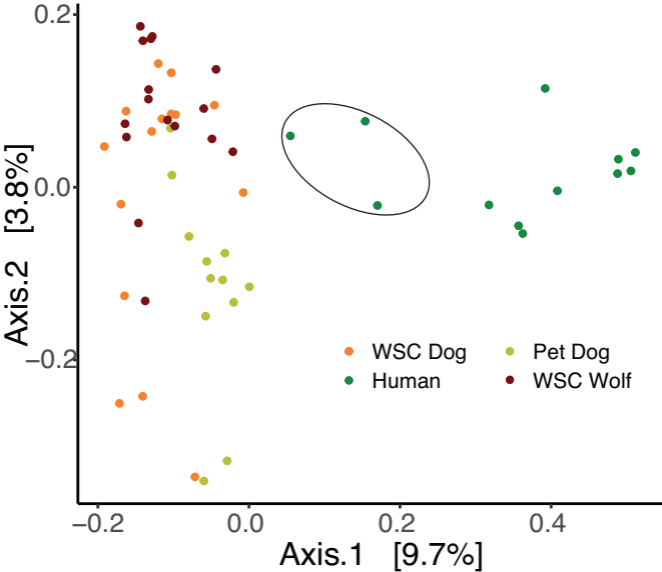

Supplement: 41598_2021_96160_MOESM1_ESM.pdf [file 41598_2021_96160_MOESM1_ESM.pdf]
